# Supplementary material
Source: PubMed Central journal article supplement (PMC6853806)

**Supplementary Appendix A:** Database search

| Clinical guideline database                           | Medical literature database |
|-------------------------------------------------------|-----------------------------|
| National Guideline Clearinghouse                      | PubMed                      |
| Guidelines International Network                      | Scopus                      |
| National Institute for Health and Clinical Excellence | Google Scholar              |
| WHO   World Health Organization                       | Magiran/ SID                |

**Supplementary Appendix B:** Application layouts

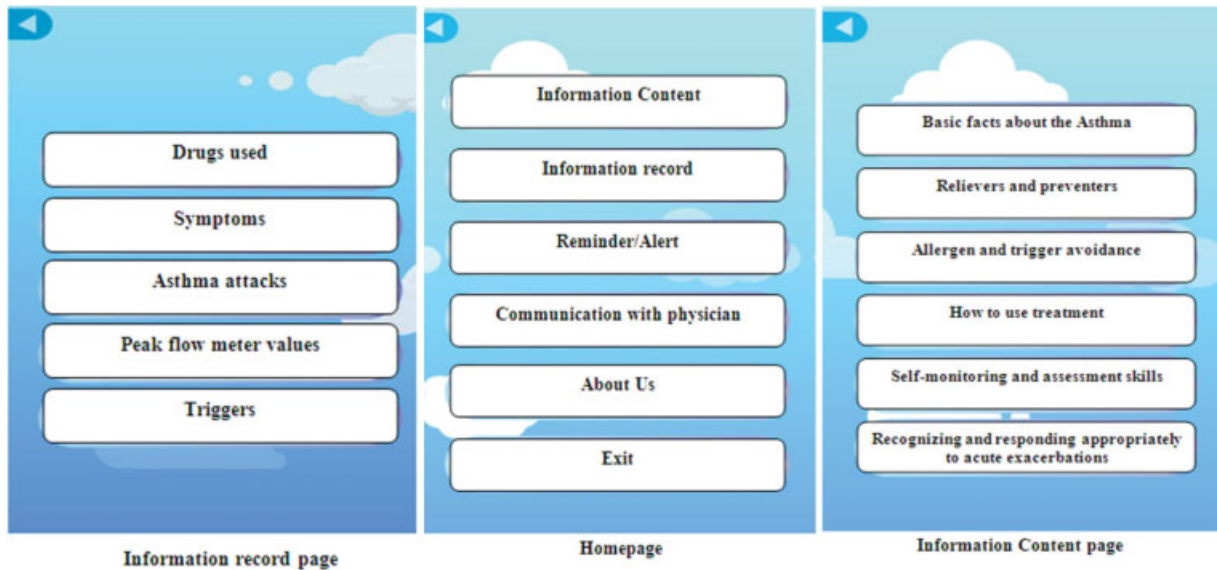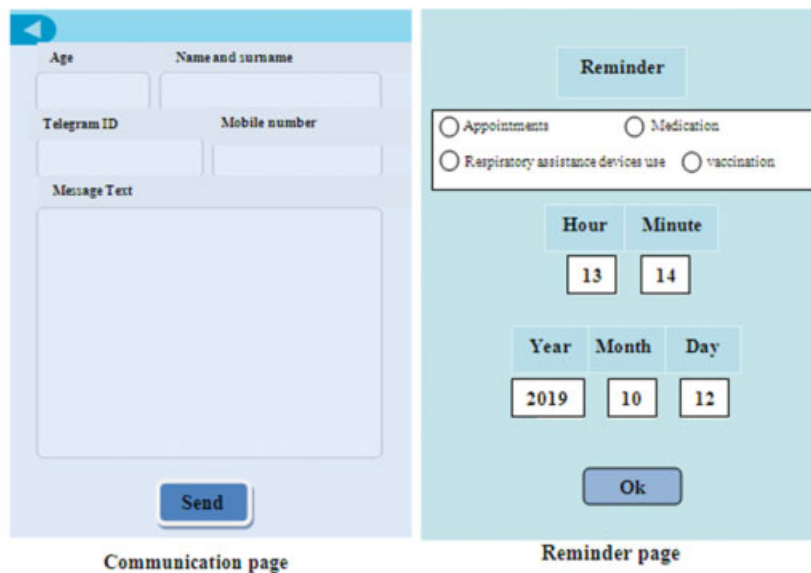

Supplement: 10-1055-s-0039-1700866-s190095ra.pdf [file 10-1055-s-0039-1700866-s190095ra.pdf]
